# Supplementary material for: Targeting macrophage checkpoint inhibitor SIRPα for anticancer therapy
Source: JCI journal article supplement (doi:10.1172/jci.insight.134728), 2020-05-19
Supplement: sd1 [file 1]

**Supplementary Figure 1. Humanized 1H9 possesses the same antigen binding specificity as its parental antibody.** Mouse 1H9 binding to SIRP $\alpha$  was detected by ELISA in the absence or presence of increasing concentrations of humanized 1H9. Each sample was assayed in duplicate. Data represent mean  $\pm$  S.D.

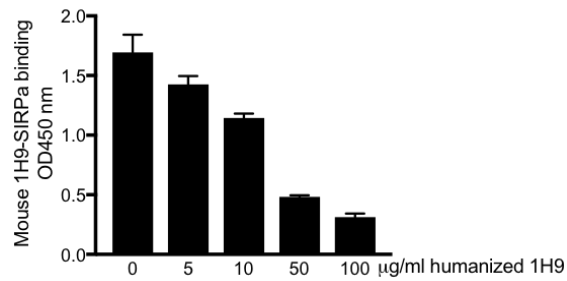

**Supplementary Figure 2. Neutrophil-mediated cytotoxicity.** Raji cells were co-incubated with purified human neutrophils for 4 hours in the presence of 10  $\mu\text{g/ml}$  of 1H9 and rituximab at the concentrations indicated. Data represent mean  $\pm$  S.D.

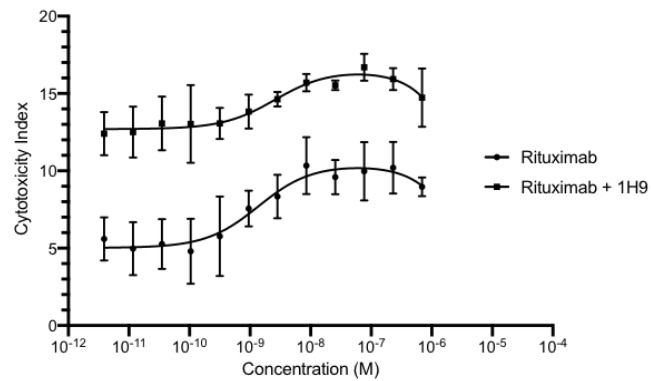

**Supplementary Figure 3. Hemoglobin level in individual mouse.** B16F10 ( $2.5 \times 10^5$ ) cells were engrafted subcutaneously into CD47-SIRP $\alpha$  double humanized mice (n=7 for PBS, 6 for anti-PD-L1, and 8 for the 1H9 and MIAP410 alone and in the combination groups). 12 days post engraftment, treatment was initiated with PBS, 10 mg/kg of 1H9, anti-PD-L1 antibody, MIAP410, or combination of 1H9 or MIAP410 with anti-PD-L1 antibody three times a week until the termination of the study. Hemoglobin was measured on day -6, 1, 11, 15, 22, and 29.

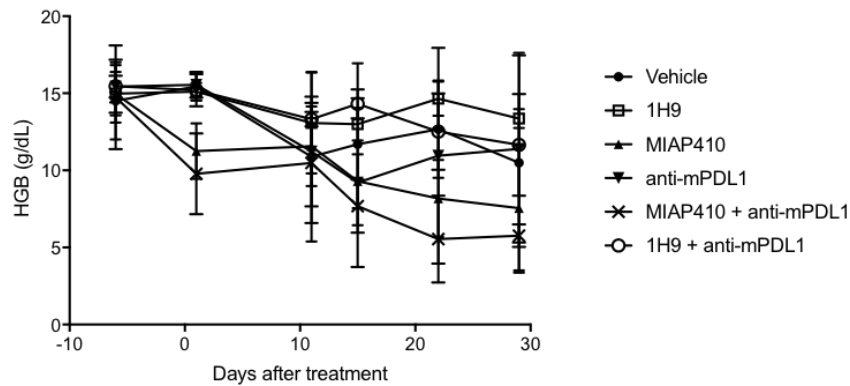

**Supplementary Table 1. Genotypes of SIRP $\alpha$  from 22 human donors.**

| Donor | SIRP $\alpha$ Allelic variant |
|-------|-------------------------------|
| 468   | V2/V2                         |
| 470   | V1/V1                         |
| 707   | V1/V1                         |
| 845   | V1/V1                         |
| 047   | V1/V1                         |
| 620   | V1/V1                         |
| 622   | V1/V1                         |
| 353   | V1/V1                         |
| 589   | V1/V1                         |
| 590   | V1/V1                         |
| 52    | V1/V1                         |
| 82    | V1/V1                         |
| 83    | V1/V1                         |
| 84    | V1/V1                         |
| 149   | V1/V1                         |
| 352   | V1/V1                         |
| 37    | V1/V1                         |
| 38    | V1/V5                         |
| 339   | V1/V1                         |
| 952   | V1/V1                         |
| 995   | V1/V1                         |
| 997   | V2/V2                         |
